# Supplementary material for: Functional Haplotype and eQTL Analyses of Genes Affecting Cadmium Content in Cultivated Rice
Source: PubMed Central journal article supplement (PMC6872708; doi:10.1186/s12284-019-0340-8), 2019-11-21

**a**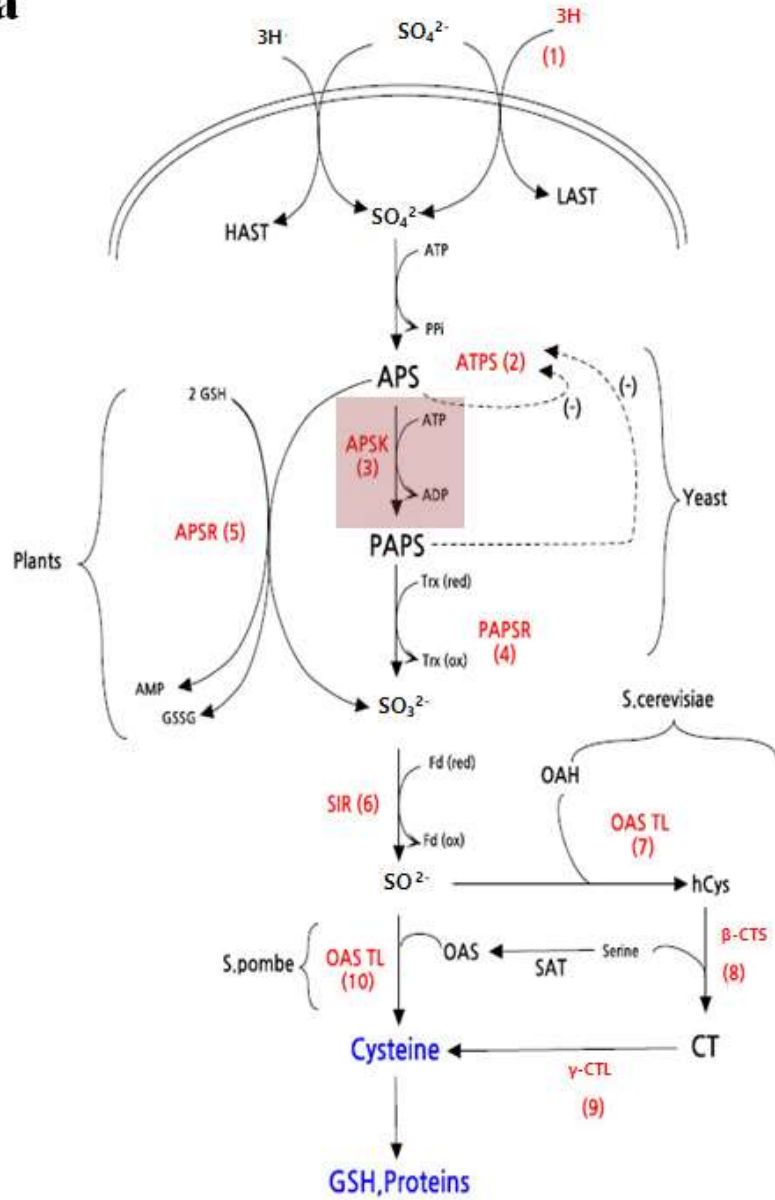**b**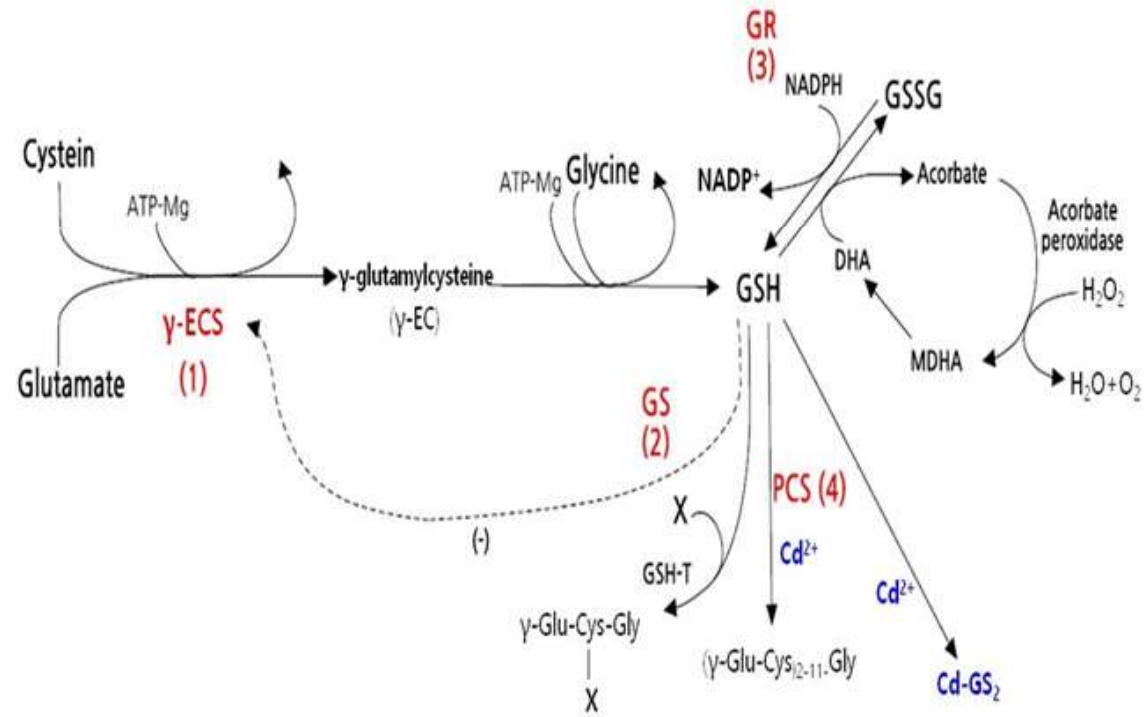

Supplement: 12284_2019_340_MOESM1_ESM.pdf [file 12284_2019_340_MOESM1_ESM.pdf]
